# Supplementary material for: Initial Repetitive Nerve Stimulation Test Predicts Conversion of Ocular Myasthenia Gravis to Generalized Myasthenia Gravis
Source: PubMed Central journal article supplement — J Clin Neurol. 2021 Mar 30;17(2):265–72. doi: 10.3988/jcn.2021.17.2.265 (PMC8053540; doi:10.3988/jcn.2021.17.2.265), 2021-03-30
Supplement: jcn-17-265-s001.pdf [file jcn-17-265-s001.pdf]

**Supplementary Table 1.** Comparison of response decreases on the initial RNS test between the ROMG and the GOMG groups

|                                | <b>ROMG<br/>(n=88)</b> | <b>GOMG<br/>(n=24)</b> | <b>p</b> |
|--------------------------------|------------------------|------------------------|----------|
| Response decrease in RNS test* |                        |                        |          |
| Orbicularis oculi              | 6.8±8.4                | 12.2±15.5              | 0.116    |
| Nasalis                        | 7.8±8.1                | 12.7±14.2              | 0.112    |
| Trapezius                      | 4.6±5.3                | 9.1±10.0               | 0.044    |
| Abductor digiti minimi         | 1.3±2.1                | 4.6±5.8                | 0.011    |
| Flexor carpi ulnaris           | 3.1±4.6                | 9.5±10.7               | 0.009    |

Data are mean±SD values.

\*If no decrease in the response was detected, the decrease was assigned as 0.

GOMG: symptom conversion to generalized myasthenia gravis, RNS: repetitive nerve stimulation, ROMG: remained as ocular myasthenia gravis.
